# Supplementary material for: Monitoring the heme iron state in horseradish peroxidase to detect ultratrace amounts of hydrogen peroxide in alcohols
Source: Royal Society of Chemistry journal article supplement (doi:10.1039/d1ra00733e), 2021-01-01
Supplement: d1ra00733e1.pdf [file d1ra00733e1.pdf]

**Monitoring the Heme Iron State in Horseradish Peroxidase to Detect Ultratrace Amount of  
Hydrogen Peroxide in Alcohols**

*Raheleh Ravanfar, Alireza Abbaspourrad\**

Department of Food Science, Cornell University, Ithaca, NY, USA

\* Corresponding author: Alireza Abbaspourrad, e-mail: [alireza@cornell.edu](mailto:alireza@cornell.edu)

## Supplementary Figures

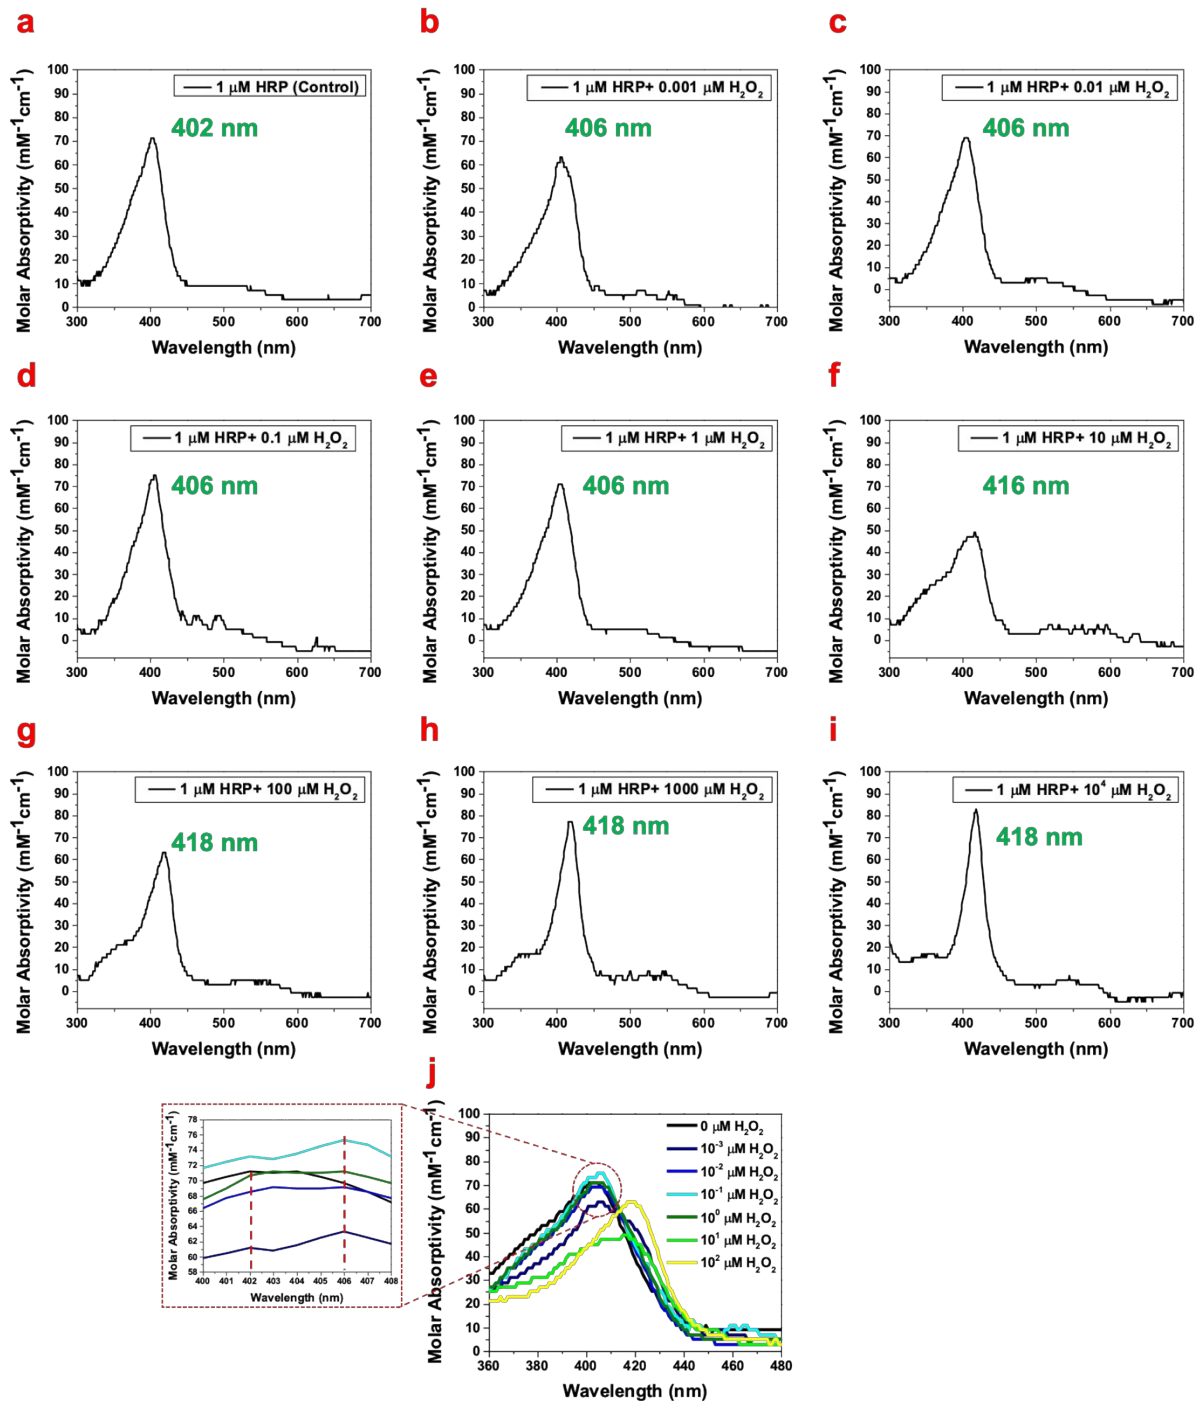

**Figure S1.** UV/Vis spectra of 1  $\mu\text{M}$  Horseradish Peroxidase (500  $\mu\text{L}$ ) upon the addition of 500  $\mu\text{L}$  of ethanol containing  $\text{H}_2\text{O}_2$  at these concentrations a) 0  $\mu\text{M}$ , b) 0.001  $\mu\text{M}$ , c) 0.01  $\mu\text{M}$ , d) 0.1  $\mu\text{M}$ ,

e) 1  $\mu\text{M}$ , f) 10  $\mu\text{M}$ , g) 100  $\mu\text{M}$ , h) 1000  $\mu\text{M}$ , and i)  $10^4$   $\mu\text{M}$ . The wavelengths associated to Soret bands are shown in green. j) All the UV/Vis spectra of the 1  $\mu\text{M}$  HRP solution upon the addition of  $\text{H}_2\text{O}_2$  in ethanol at different concentrations are shown together.

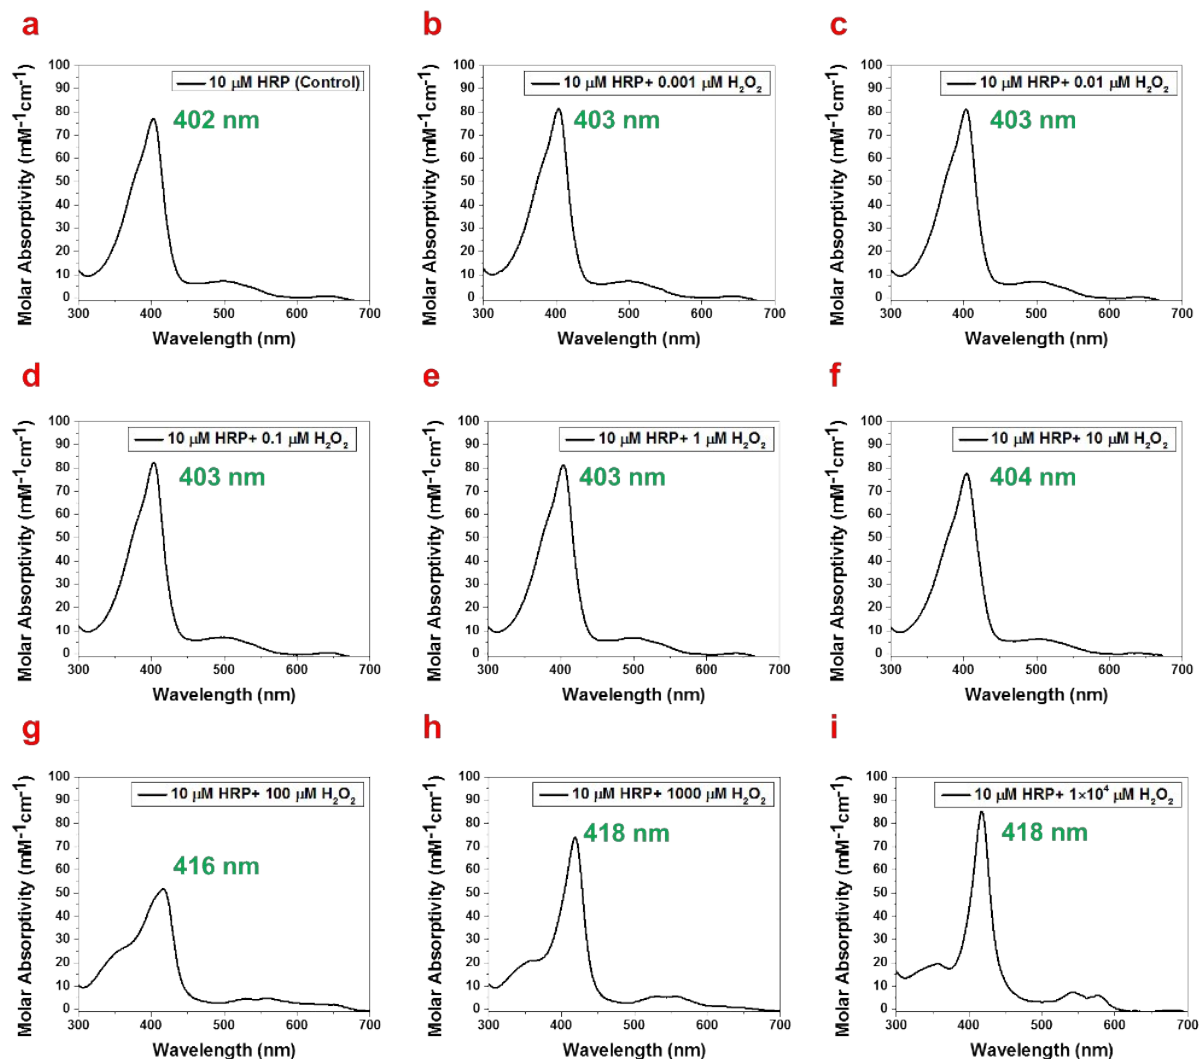

**Figure S2.** UV/Vis spectra of the 10  $\mu\text{M}$  HRP solution in 0.1 M phosphate buffer (500  $\mu\text{L}$ ) upon the addition of 500  $\mu\text{L}$  of ethanol containing  $\text{H}_2\text{O}_2$  at these concentrations a) 0  $\mu\text{M}$ , b) 0.001  $\mu\text{M}$ , c) 0.01  $\mu\text{M}$ , d) 0.1  $\mu\text{M}$ , e) 1  $\mu\text{M}$ , f) 10  $\mu\text{M}$ , g) 100  $\mu\text{M}$ , h) 1000  $\mu\text{M}$ , and i)  $10^4$   $\mu\text{M}$ . The wavelengths associated to Soret bands are shown in green. All HRP solutions were prepared in 0.1 M potassium phosphate buffer (pH= 6.0).

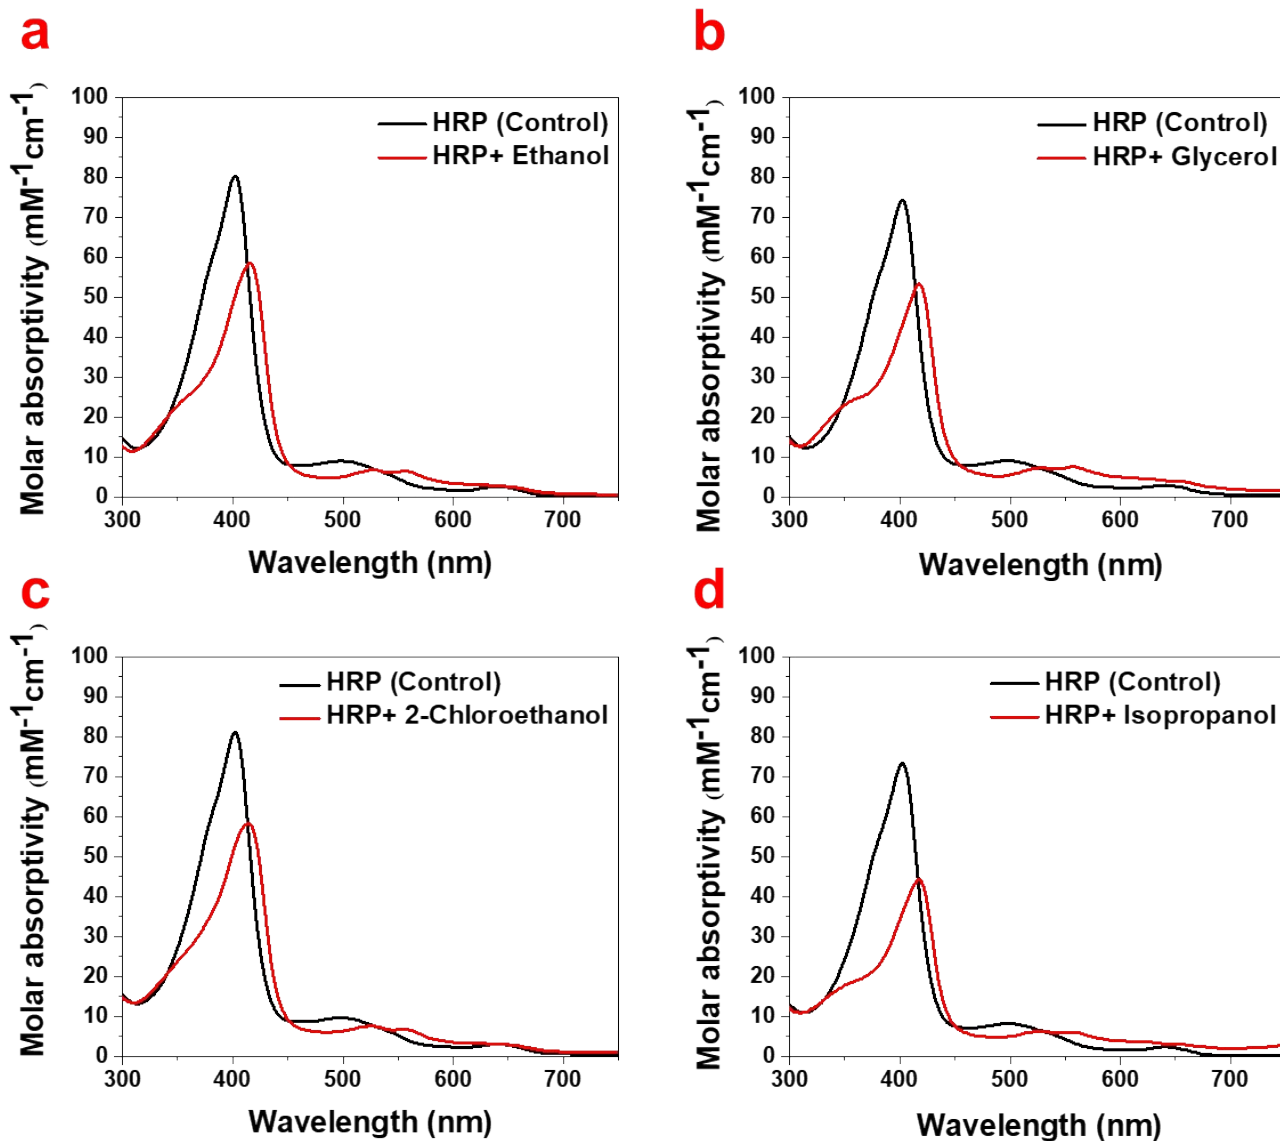

Figure S3. UV/visible absorption spectra of 500  $\mu\text{L}$  HRP solution (10  $\mu\text{M}$ ) after treatment with 500  $\mu\text{L}$  a) ethanol, b) glycerol, c) 2-chloroethanol, and d) isopropanol, containing unreported amounts of  $\text{H}_2\text{O}_2$ .

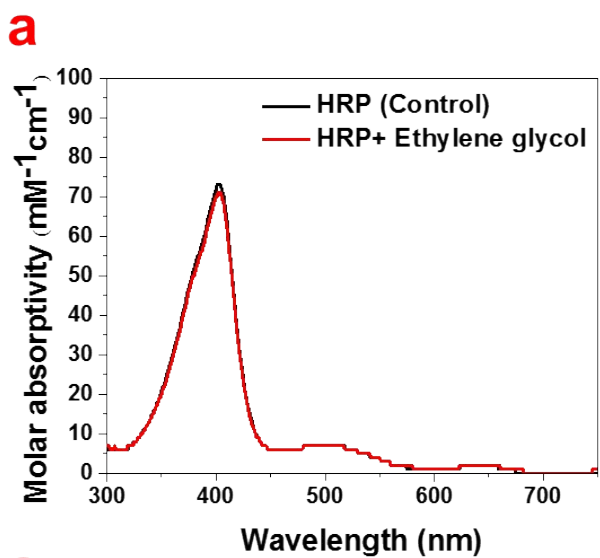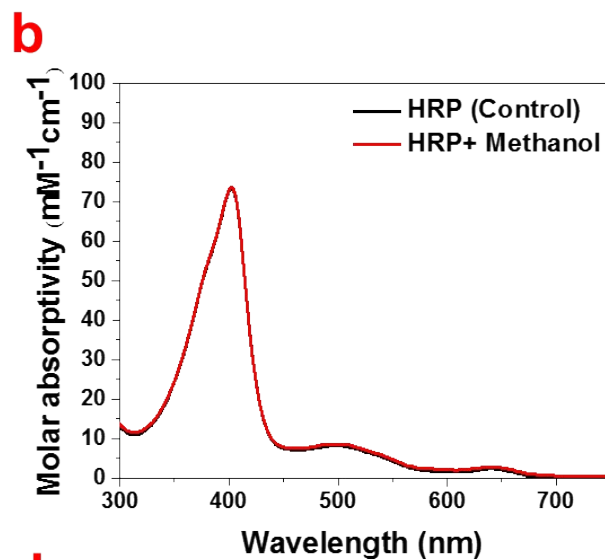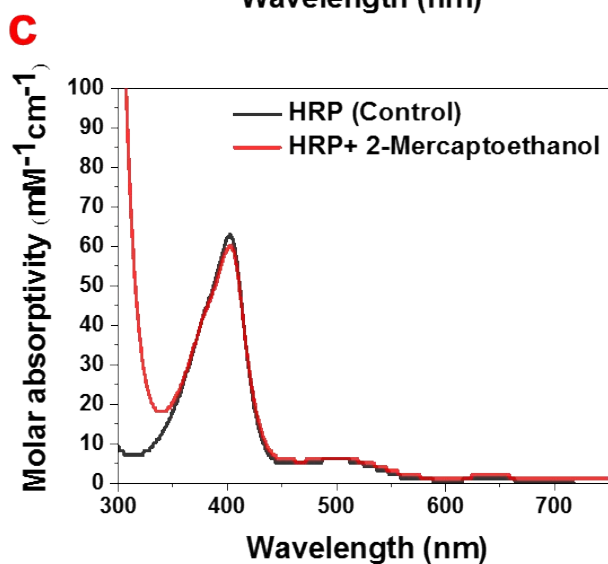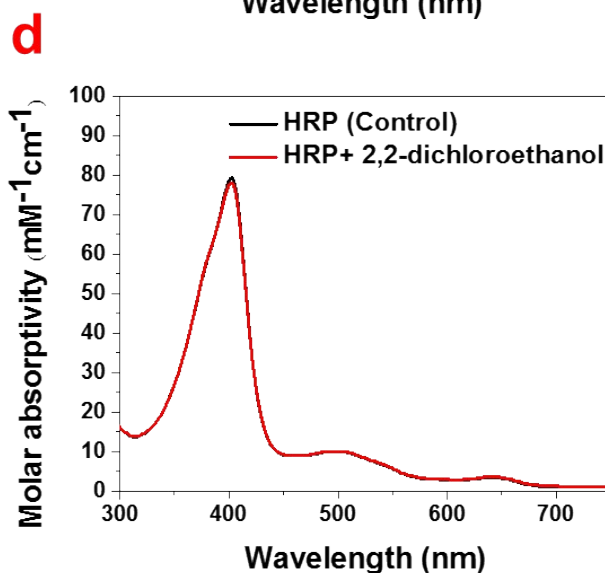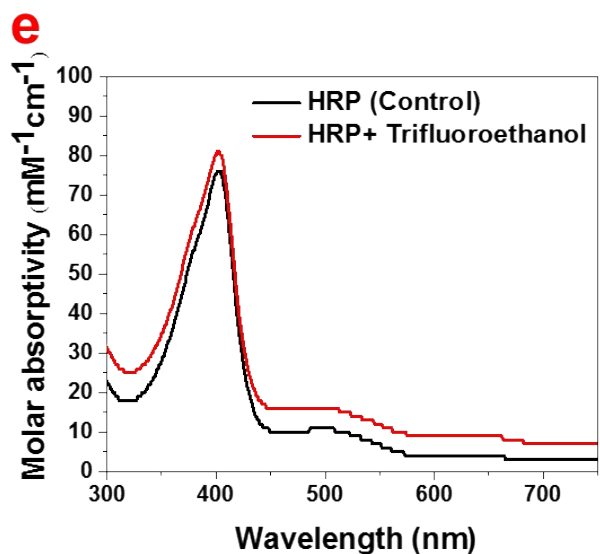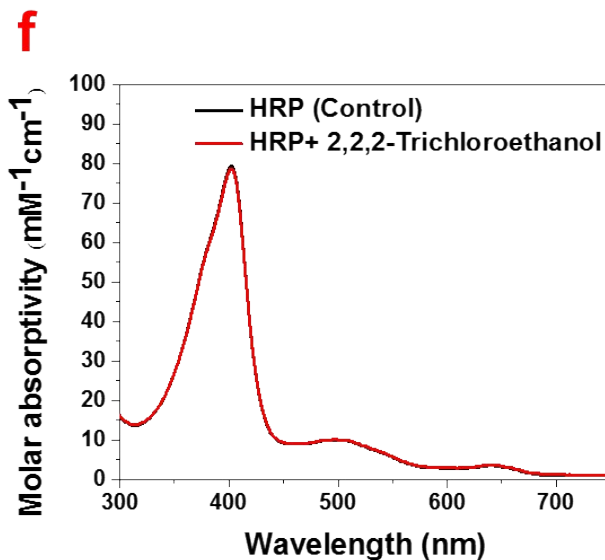

Figure S4. UV/visible absorption spectra of 500  $\mu\text{L}$  HRP solution (10  $\mu\text{M}$ ) after treatment with 500  $\mu\text{L}$  a) ethylene glycol, b) methanol, c) 2-mercaptoethanol, d) 2,2-dichloroethanol, e) trifluoroethanol, and f) 2,2,2,-trichloroethanol.

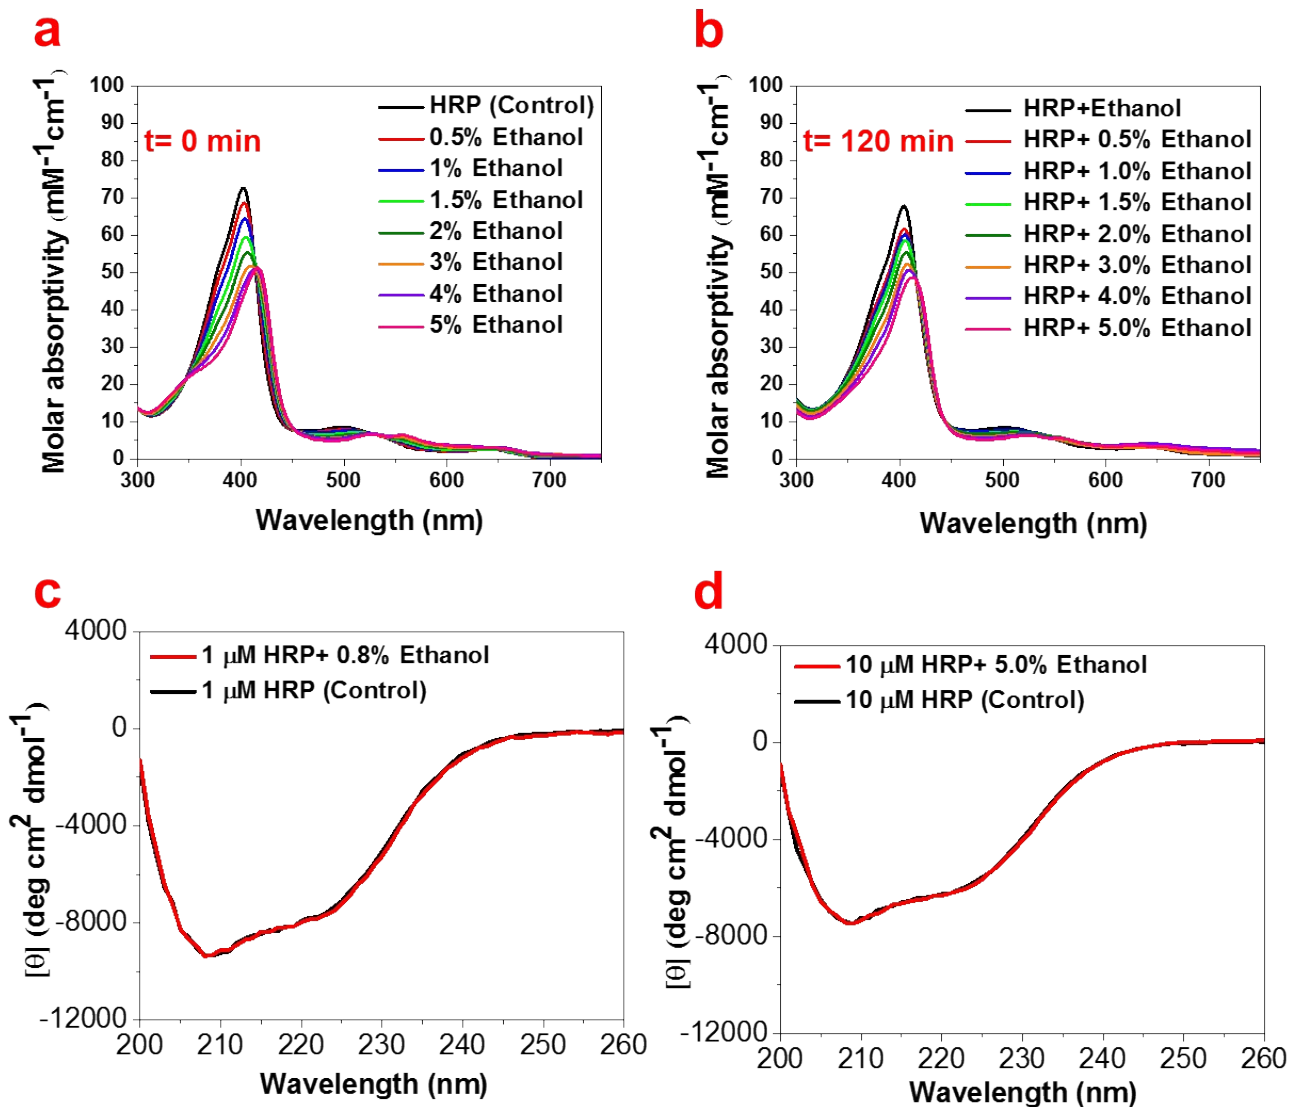

Figure S5. The red shifts upon a) the first addition of ethanol containing 100  $\mu\text{M}$   $\text{H}_2\text{O}_2$  and b) the second addition of ethanol containing 100  $\mu\text{M}$   $\text{H}_2\text{O}_2$  after the decay of the ferryl intermediate formed from the first addition of ethanol. c) Circular dichroism spectroscopy for 500  $\mu\text{L}$  of 1  $\mu\text{M}$

HRP solution in potassium phosphate buffer (0.1 M, pH= 6.0) before and after treatment with 500  $\mu$ L ethanol containing 80  $\mu$ M H<sub>2</sub>O<sub>2</sub>. d) Circular dichroism spectroscopy of 500  $\mu$ L of 10  $\mu$ M HRP solution in potassium phosphate buffer (0.1 M, pH= 6.0) before and after treatment with 500  $\mu$ L ethanol containing 80  $\mu$ M H<sub>2</sub>O<sub>2</sub>.

## High-spin Region

## Low-spin Region

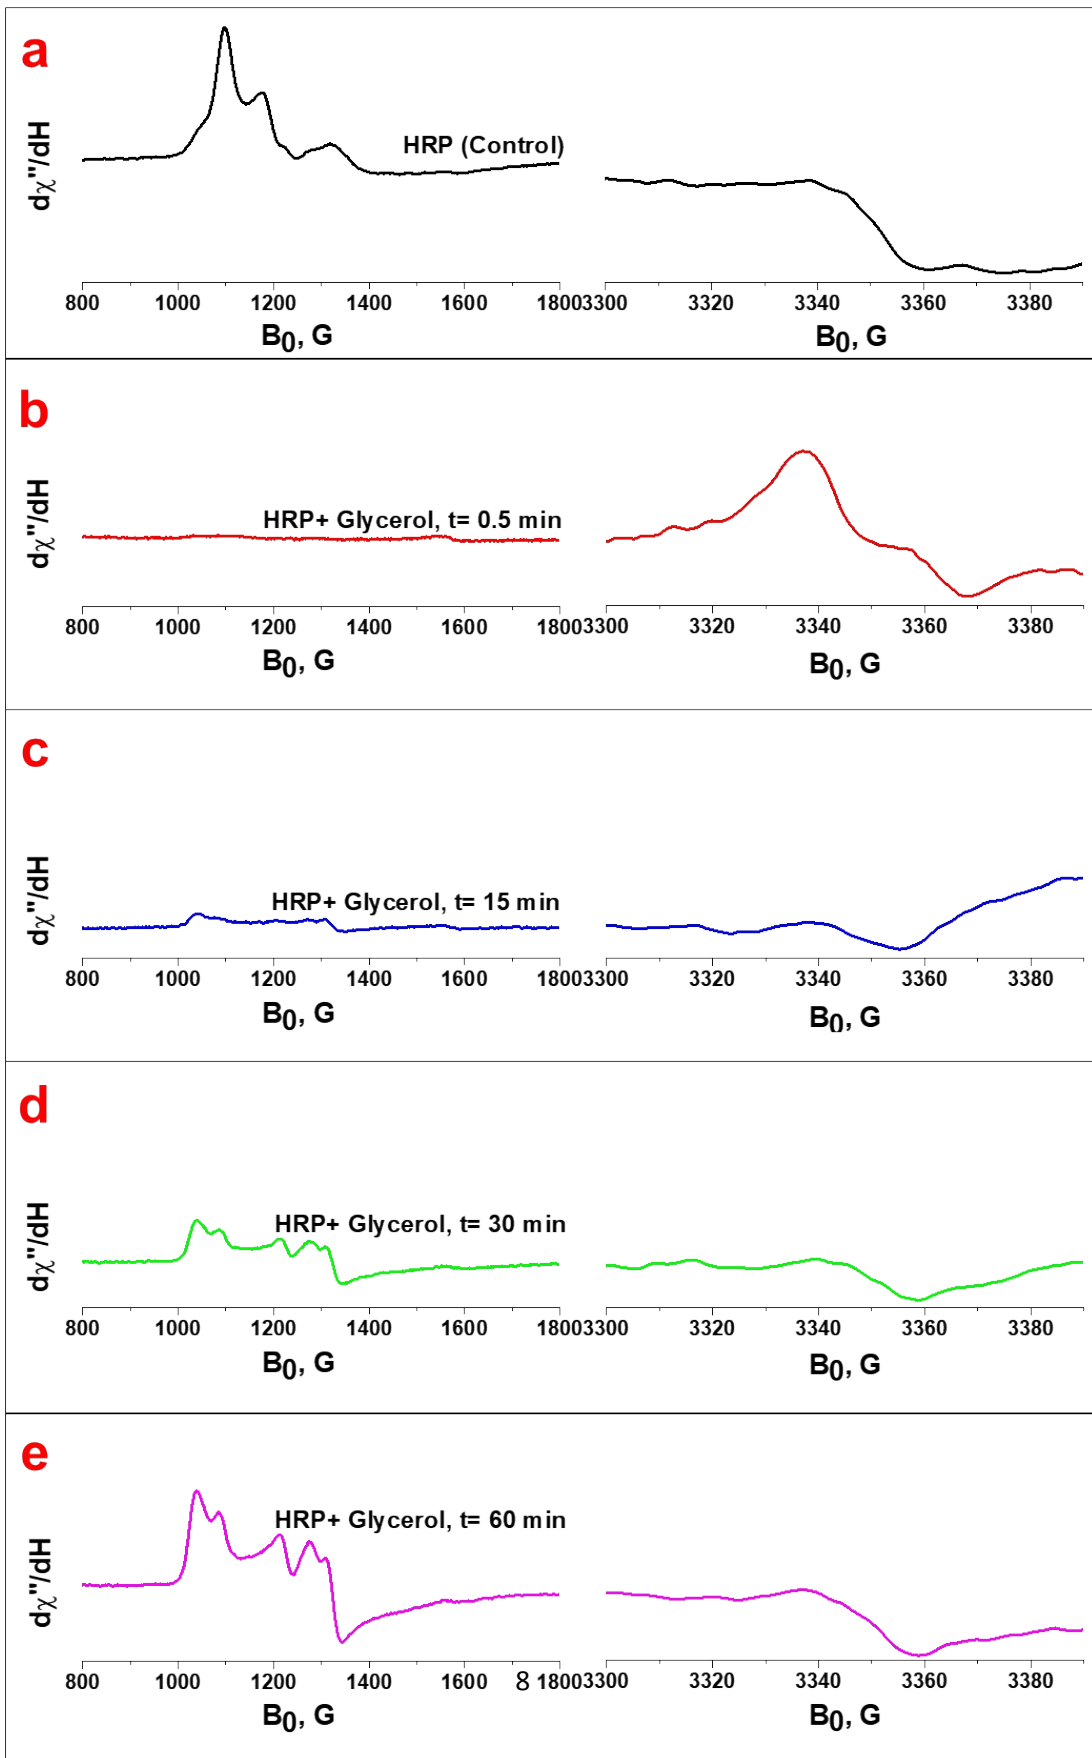



Figure S6. a) EPR spectra of the native HRP (control) at both high-spin and low-spin regions. b, c, d, e) EPR spectra of the 100  $\mu\text{L}$  HRP solution upon the addition of 100  $\mu\text{L}$  glycerol containing  $\text{H}_2\text{O}_2$  impurity at 0.5 min, 15 min, 30 min, and 60 min, respectively. Spectra were collected at 12 K and 625  $\mu\text{W}$ .

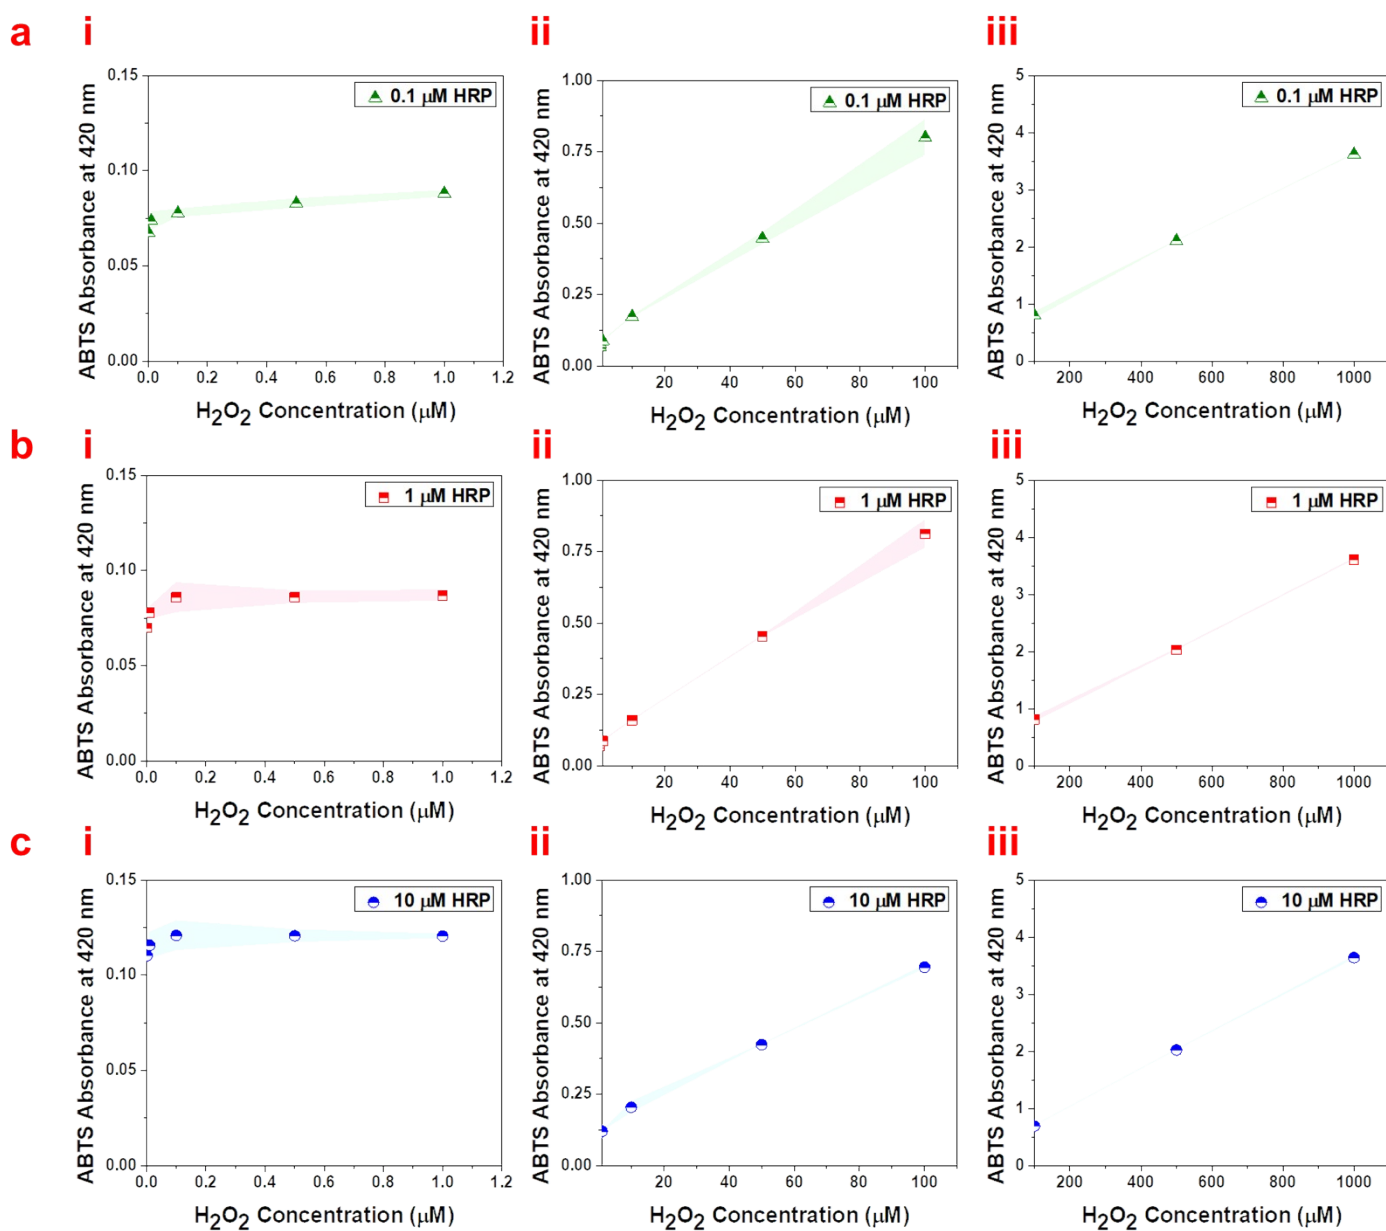

Figure S7. UV/Vis absorbance of 2 mM ABTS at 420 nm at different ranges of H<sub>2</sub>O<sub>2</sub> impurity of ethanol (i: 0 μM – 1 μM, ii: 1 μM – 100 μM, and iii: 100 μM – 1000 μM) using HRP solution concentrations of a) 0.1 μM, b) 1 μM, and c) 10 μM. 50 μL of ABTS in 0.1 M potassium phosphate buffer (pH 6.0) was mixed with 50 μL of HRP solution and 50 μL of ethanol containing different concentrations of H<sub>2</sub>O<sub>2</sub>. The absorbance at 420 nm ( $\lambda_{\text{max}}$  of the oxidized product of ABTS) was recorded versus H<sub>2</sub>O<sub>2</sub> concentrations at 25 °C 30 min after mixing, which was linearly increased.

Table S1. The formulas to measure the impurity of H<sub>2</sub>O<sub>2</sub> in alcohols based on the absorbance range of ABTS. Briefly, 50 μL of ABTS (20 mM) in 0.1 M potassium phosphate buffer (pH 6.0) was mixed with 50 μL of HRP solution (0.1 μM) and 50 μL of ethanol containing H<sub>2</sub>O<sub>2</sub>. The absorbance at 420 nm ( $\lambda_{\text{max}}$  of the oxidized product of ABTS) was recorded versus H<sub>2</sub>O<sub>2</sub> concentrations at 25 °C, 30 min after mixing, which was linearly increased. Three main formulas were derived from the linear fits and were used to measure the H<sub>2</sub>O<sub>2</sub> impurity in alcohols.

| Formula No. | Formula             | R <sup>2</sup> | Range of ABTS absorbance (a.u) | Range of H <sub>2</sub> O <sub>2</sub> impurity (μM) |
|-------------|---------------------|----------------|--------------------------------|------------------------------------------------------|
| 1           | $y = 0.081x + 0.13$ | 0.97           | 0-0.3                          | 0 - 1                                                |
| 2           | $y = 0.005x + 0.20$ | 0.99           | 0.3-1.0                        | 1 - 100                                              |
| 3           | $y = 0.003x + 0.37$ | 0.99           | 1.0-4.0                        | 100 - 1000                                           |

Table S2. Quantification of H<sub>2</sub>O<sub>2</sub> impurity in common primary and secondary alcohols. 50 μL of ABTS (20 mM) in 0.1 M potassium phosphate buffer (pH 6.0) was mixed with 50 μL of HRP solution (0.1 μM) and 50 μL of alcohols containing impurity of H<sub>2</sub>O<sub>2</sub>. The absorbance at 420 nm ( $\lambda_{\text{max}}$  of the oxidized product of ABTS) was recorded versus H<sub>2</sub>O<sub>2</sub> concentrations at 25 °C 30 min after mixing at 1 cm path length, which was linearly increased. The mean and standard deviation for three absorbance measurements of three samples prepared similarly have been shown in the second column from left.

| Alcohol         | ABTS radical cation absorbance (a.u.), 1 cm path length | Applied Formula No. | H <sub>2</sub> O <sub>2</sub> impurity (μM) |
|-----------------|---------------------------------------------------------|---------------------|---------------------------------------------|
| Ethanol         | 0.600± 0.013                                            | 2                   | 79.9                                        |
| Glycerol        | 0.279± 0.003                                            | 1                   | 1.8                                         |
| Benzyl alcohol  | 3.479± 0.003                                            | 3                   | 1036.4                                      |
| 2-Chloroethanol | 1.844± 0.026                                            | 3                   | 491.4                                       |
| 1-Butanol       | 0.187± 0.005                                            | 1                   | 0.7                                         |
| 1-Hexanol       | 0.304± 0.004                                            | 1                   | 2.1                                         |
| 1-propanol      | 0.191± 0.002                                            | 1                   | 0.8                                         |
| Isopropanol     | 0.136± 0.008                                            | 1                   | 0.1                                         |
